# Supplementary material
Source: Springer Nature journal article supplement (https://www.springermedizin.de/resource/supplementary/12947_2014_533_MOESM2_ESM.pdf/9555970)

**A Inter-observer differences in R-carotid foot and R-iliac foot time measurements**

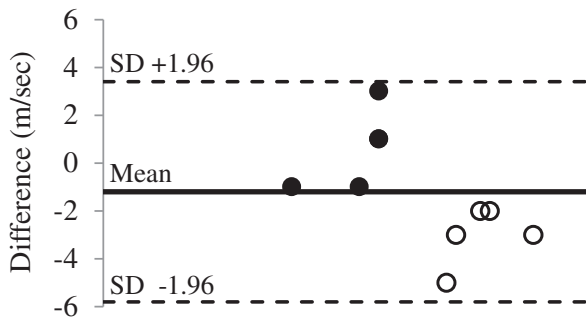

**B Intra-observer differences in R-carotid foot and R-iliac foot time measurements**

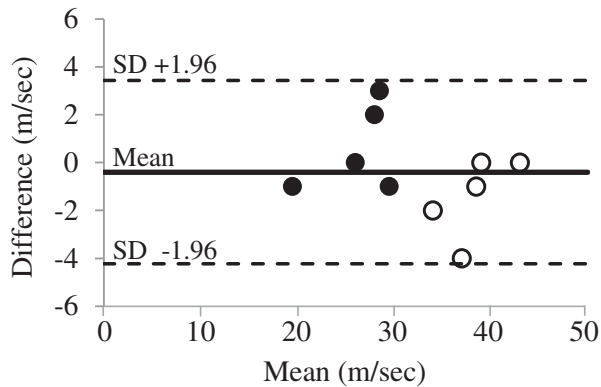

Supplement: MOESM2 [file 9555970]
